# Supplementary material
Source: HighWire-hosted journal article supplement (https://bmjopen.bmj.com/content/15/5/e103296)
Supplement: inline-supplementary-material-3 [file inline-supplementary-material-3.pdf]

Table S11. Critical appraisal table for cohort studies on the use of VPA

| Author | Year | Type of study                 | Selection<br>(max 1 star)            |                                     |                              |                                                                                   | Comparability<br>of cohorts<br>(max 2 stars) | Outcome<br>(max 1 star)     |                             |                             | Verdict |
|--------|------|-------------------------------|--------------------------------------|-------------------------------------|------------------------------|-----------------------------------------------------------------------------------|----------------------------------------------|-----------------------------|-----------------------------|-----------------------------|---------|
|        |      |                               | Representa<br>titveness of<br>cohort | Selection of non-<br>exposed cohort | Ascertainment<br>of exposure | Demonstration that<br>outcome of interest was<br>not present at start of<br>study |                                              | Ascertainment<br>of outcome | Long<br>enough<br>follow up | Adequace<br>of follow<br>up |         |
| Chavez | 2020 | Retrospective cohort          |                                      | *                                   | *                            | *                                                                                 | **                                           | *                           | *                           |                             | Good    |
| Lin    | 2018 | retrospective cohort study    | *                                    | *                                   | *                            | *                                                                                 | **                                           | *                           | *                           |                             | Good    |
| Huang  | 2016 | retrospective cohort study    | *                                    | *                                   | *                            | *                                                                                 | **                                           | *                           | *                           | *                           | Good    |
| Kaae   | 2010 | population-based cohort study | *                                    | *                                   | *                            | *                                                                                 | **                                           | *                           | *                           | *                           | Good    |
| Kang   | 2014 | retrospective cohort study    |                                      | *                                   | *                            | *                                                                                 | **                                           | *                           | *                           | *                           | Good    |
| Singh  | 2011 | cohort study                  | *                                    | *                                   | *                            | *                                                                                 | **                                           | *                           | *                           | *                           | Good    |
| Yang   | 2022 | Nationwide cohort             | *                                    | *                                   | *                            |                                                                                   | **                                           | *                           | *                           | *                           | Good    |

Table S12. Critical appraisal table for case control studies on the use of VPA

| Author         | Year | Type of study       | Selection<br>(max 1 star)   |                                                                    |                       | Comparability<br>(max 2 stars) |                                     | Outcome<br>(max 1 star)  |                   | Verdict |
|----------------|------|---------------------|-----------------------------|--------------------------------------------------------------------|-----------------------|--------------------------------|-------------------------------------|--------------------------|-------------------|---------|
|                |      |                     | Adequacy of case definition | Representativeness of the cases                                    | Selection of controls | Definition of controls         | Comparability of cases and controls | Ascertainment of outcome | Non-response rate |         |
| George         | 2023 | case-control        | *                           | *                                                                  | *                     | *                              | **                                  | *                        | *                 | Good    |
| Hallas         | 2009 | case control        | *                           | *                                                                  | *                     | *                              | **                                  | *                        | *                 | Good    |
| Li             | 2024 | Nested Case control | *                           | *                                                                  | *                     | *                              | **                                  | *                        | *                 | Good    |
| Kristensen     | 2019 | nested case control | *                           | *                                                                  | *                     | *                              | *                                   | *                        | *                 | Good    |
| Salminen       | 2016 | case-control        | *                           | *                                                                  | *                     | *                              | **                                  | *                        | *                 | Good    |
| Stritzelberger | 2020 | Nested case control | N/A                         | High risk of bias, not the aim of the study and not all data shown |                       |                                |                                     |                          |                   | Poor    |
| Tilhonen       | 2022 | case-control        | *                           | *                                                                  | *                     | *                              | **                                  | *                        | *                 | Good    |

Table S13. Critical appraisal table for cohort studies on the use of lithium

| Author     | Year | Type of study                   | Selection<br>(max 1 star)                                                                                      |                                 |                           |                                                                          | Comparability of cohorts<br>(max 2 stars) | Outcome<br>(max 1 star)   |                       |                       | Verdict |
|------------|------|---------------------------------|----------------------------------------------------------------------------------------------------------------|---------------------------------|---------------------------|--------------------------------------------------------------------------|-------------------------------------------|---------------------------|-----------------------|-----------------------|---------|
|            |      |                                 | Representatitveness of cohort                                                                                  | Selection of non-exposed cohort | Ascertainment of exposure | Demonstration that outcome of interest was not present at start of study |                                           | Ascertain ment of outcome | Long enough follow up | Adequace of follow up |         |
| Asgari     | 2017 | retrospectiv e cohort           |                                                                                                                | *                               | *                         | *                                                                        | **                                        | *                         | *                     | *                     | Good    |
| Lin        | 2018 | retrospectiv e cohort study     | *                                                                                                              | *                               | *                         | *                                                                        | **                                        | *                         | *                     |                       | Good    |
| Cohen      | 1998 |                                 | *                                                                                                              | *                               | *                         | *                                                                        | **                                        | *                         | *                     | *                     | Good    |
| George     | 2019 | restrospectiv e cohort study    | *                                                                                                              | *                               | *                         | *                                                                        | **                                        | *                         | *                     |                       | Good    |
| Huang      | 2016 | retrospectiv e cohort study     | *                                                                                                              | *                               | *                         | *                                                                        | **                                        | *                         | *                     | *                     | Good    |
| Kessing    | 2015 | Cohort (population based study) | *                                                                                                              |                                 | *                         | *                                                                        | **                                        | *                         | *                     |                       | Good    |
| Kessing    | 2024 | Cohort (Population based)       | *                                                                                                              | *                               | *                         | *                                                                        | **                                        | *                         | *                     | *                     | Good    |
| Martinsson | 2016 | Cohort nationwide               |                                                                                                                | *                               | *                         | *                                                                        | **                                        | *                         | *                     | *                     | Good    |
| Zaidan     | 2014 | retrospective cohort study      | N/A - Data from cohort compared to general population, expressed as standardized incidence ratio; small cohort |                                 |                           |                                                                          |                                           |                           |                       |                       | Poor    |

Table S14. Critical appraisal table for case-control studies on the use of lithium

| Author     | Year     | Type of study                                | Selection<br>(max 1 star)<br>Comparability |                                           |                          |                                                                   | Comparability<br>(Max 2 stars)           | Outcome<br>(max 1 star)         |                          | Verdict |
|------------|----------|----------------------------------------------|--------------------------------------------|-------------------------------------------|--------------------------|-------------------------------------------------------------------|------------------------------------------|---------------------------------|--------------------------|---------|
|            |          |                                              | Adequacy of case<br>definition             | Represent<br>ativeness<br>of the<br>cases | Selection of<br>controls | Definition of controls                                            |                                          | Ascertain<br>ment of<br>outcome | Non-<br>response<br>rate |         |
| Hallas     | 2009     | case control                                 | *                                          | *                                         |                          | *                                                                 |                                          | *                               | *                        | Poor    |
| Kahan      | 2018     | Case-control<br>study from<br>large database |                                            |                                           |                          | Data from large database, scale non-applicable, high risk of bias |                                          |                                 |                          | Poor    |
| Li         | 2024     | Nested Case<br>control                       | *                                          | *                                         | *                        | *                                                                 | **                                       | *                               | *                        | Good    |
| Pottengard | 2016 (1) | Nationwide<br>case control<br>study          | *                                          | *                                         | *                        | *                                                                 | **                                       | *                               | *                        | Poor    |
| Pottengard | 2016 (2) | Case control<br>study<br>nationwide          | *                                          | *                                         | *                        | *                                                                 | **                                       | *                               | *                        | Good    |
| Tamim      | 2008     | Nested case-<br>control                      | *                                          | *                                         | *                        | *                                                                 | Lithium not main<br>question of<br>study | *                               | *                        | Poor    |

Table S15. Critical appraisal table for cohort studies on the use of cimetidine

| Author  | Year | Type of study              | Selection (max 1 star)            |                                           |                              |                                                                                   | Comparability of cohorts (max 2 stars) | Outcome (max 1 star)            |                             |                          | Verdict |
|---------|------|----------------------------|-----------------------------------|-------------------------------------------|------------------------------|-----------------------------------------------------------------------------------|----------------------------------------|---------------------------------|-----------------------------|--------------------------|---------|
|         |      |                            | Representatitvenes<br>s of cohort | Selection<br>of non-<br>exposed<br>cohort | Ascertainment<br>of exposure | Demonstration that<br>outcome of interest<br>was not present at<br>start of study |                                        | Ascertain<br>ment of<br>outcome | Long<br>enough<br>follow up | Adequace of<br>follow up |         |
| Moller  | 1989 | Cohort                     | No control, high risk of bias     |                                           |                              |                                                                                   |                                        |                                 |                             |                          | Poor    |
| Rossing | 2000 | Retrospective cohort study | *                                 | *                                         |                              | *                                                                                 | **                                     | *                               | *                           | *                        | Good    |
| Velicer | 2006 | Cohort study               |                                   | *                                         |                              | *                                                                                 | **                                     | *                               | *                           | *                        | Fair    |

Table S16. Critical appraisal table for surveillance and case-control studies on the use of cimetidine

| Author      | Year | Type of study                               | Selection<br>(max 1 star)                                                                |                                           |                          |                        | Comparability<br>(Max 2 stars)            | Outcome<br>(max 1 star)         |                          | Verdict |
|-------------|------|---------------------------------------------|------------------------------------------------------------------------------------------|-------------------------------------------|--------------------------|------------------------|-------------------------------------------|---------------------------------|--------------------------|---------|
|             |      |                                             | Adequacy of<br>case definition                                                           | Represent<br>ativeness<br>of the<br>cases | Selection of<br>controls | Definition of controls | Comparability of<br>cases and<br>controls | Ascertain<br>ment of<br>outcome | Non-<br>response<br>rate |         |
| Colin Jones | 1985 | case control<br>study                       | No representative outcome; already had gastric ulcers, only age and sex matched controls |                                           |                          |                        |                                           |                                 |                          | Poor    |
| Colin Jones | 1991 | surveillance<br>study                       | No control, N/A                                                                          |                                           |                          |                        |                                           |                                 |                          | N/A     |
| Coogan      | 2005 | Database<br>study/case-<br>control          | *                                                                                        |                                           | *                        |                        | **                                        |                                 |                          | Poor    |
| Holly       | 1997 | population-<br>based case-<br>control study |                                                                                          |                                           |                          | *                      | **                                        | *                               |                          | Poor    |
| Mathes      | 2008 | Population<br>based case-<br>control study  | *                                                                                        | *                                         | *                        | *                      | **                                        | *                               |                          | Good    |
| Moller      | 1992 | Case-control<br>study                       | High risk of bias                                                                        |                                           |                          |                        |                                           |                                 |                          | Poor    |
| Schumacher  | 1990 | Case-control<br>study                       | *                                                                                        | *                                         |                          |                        | **                                        |                                 |                          | Poor    |

Table S17. Critical appraisal table for cohort studies on the use of haloperidol, clozapine, and olanzapine

| Author   | Year | Type of study           | Selection<br>(max 1 star)            |                                     |                              |                                                                                   | Comparability<br>of cohorts<br>(max 2 stars) | Outcome<br>(max 1 star)     |                             |                             | Verdict |
|----------|------|-------------------------|--------------------------------------|-------------------------------------|------------------------------|-----------------------------------------------------------------------------------|----------------------------------------------|-----------------------------|-----------------------------|-----------------------------|---------|
|          |      |                         | Representa<br>titveness of<br>cohort | Selection of non-<br>exposed cohort | Ascertainment<br>of exposure | Demonstration that<br>outcome of interest was<br>not present at start of<br>study |                                              | Ascertainment<br>of outcome | Long<br>enough<br>follow up | Adequace<br>of follow<br>up |         |
| Tilhonen | 2022 | cohort study            | *                                    | *                                   | *                            | **                                                                                | *                                            | *                           | *                           |                             | Good    |
| Wang     | 2002 | Retrospective<br>cohort | *                                    |                                     | *                            | *                                                                                 | *                                            | *                           | *                           | *                           | Good    |

Table S18. Critical appraisal table for case-control studies on the use of haloperidol, clozapine, and olanzapine

| Author     | Year | Type of study                               | Selection<br>(max 1 star)                                          |                                           |                          |                        | Comparability<br>(max 2 stars) | Outcome<br>(max 1 star)         |                          | Verdict   |
|------------|------|---------------------------------------------|--------------------------------------------------------------------|-------------------------------------------|--------------------------|------------------------|--------------------------------|---------------------------------|--------------------------|-----------|
|            |      |                                             | Adequacy of<br>case definition                                     | Represent<br>ativeness<br>of the<br>cases | Selection of<br>controls | Definition of controls |                                | Ascertain<br>ment of<br>outcome | Non-<br>response<br>rate |           |
| Brainerd   | 2024 | Case Control<br>study                       | *                                                                  | *                                         | *                        | *                      | **                             | *                               | *                        | Good      |
| Chen       | 2022 | Case-control<br>study                       | *                                                                  | *                                         | *                        | *                      | **                             | *                               | *                        | Good      |
| Friedman   | 2020 | Case-control                                | *                                                                  | *                                         | *                        | *                      | **                             | *                               | *                        | Good      |
| Hsieh      | 2005 | Database<br>study/case-<br>control          | Scale not fully applicable due to study design, high risk of bias. |                                           |                          |                        |                                |                                 |                          | Poor; N/A |
| Pottengard | 1997 | population-<br>based case-<br>control study | *                                                                  | *                                         | *                        | *                      | **                             | *                               | *                        | Good      |
| Tiihonen   | 1990 | Case-control<br>study                       | *                                                                  | *                                         | *                        | *                      | **                             | *                               | *                        | Good      |
